# Supplementary figures and images for: Neural coding in barrel cortex during whisker-guided locomotion
Source: eLife journal article supplement (doi:10.7554/elife.12559), 2015-12-22

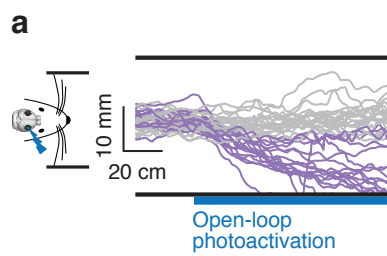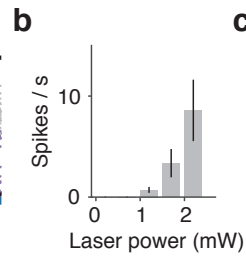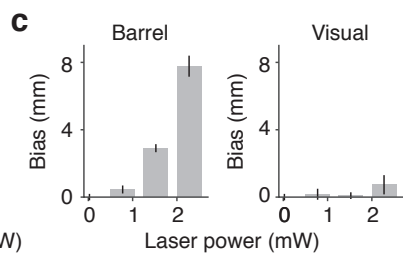

Supplement: supp [file elife_poa_e12559_Figure_2_figure_supplement_1.pdf › elife_poa_e12559_Figure_2_figure_supplement_1.pdf]

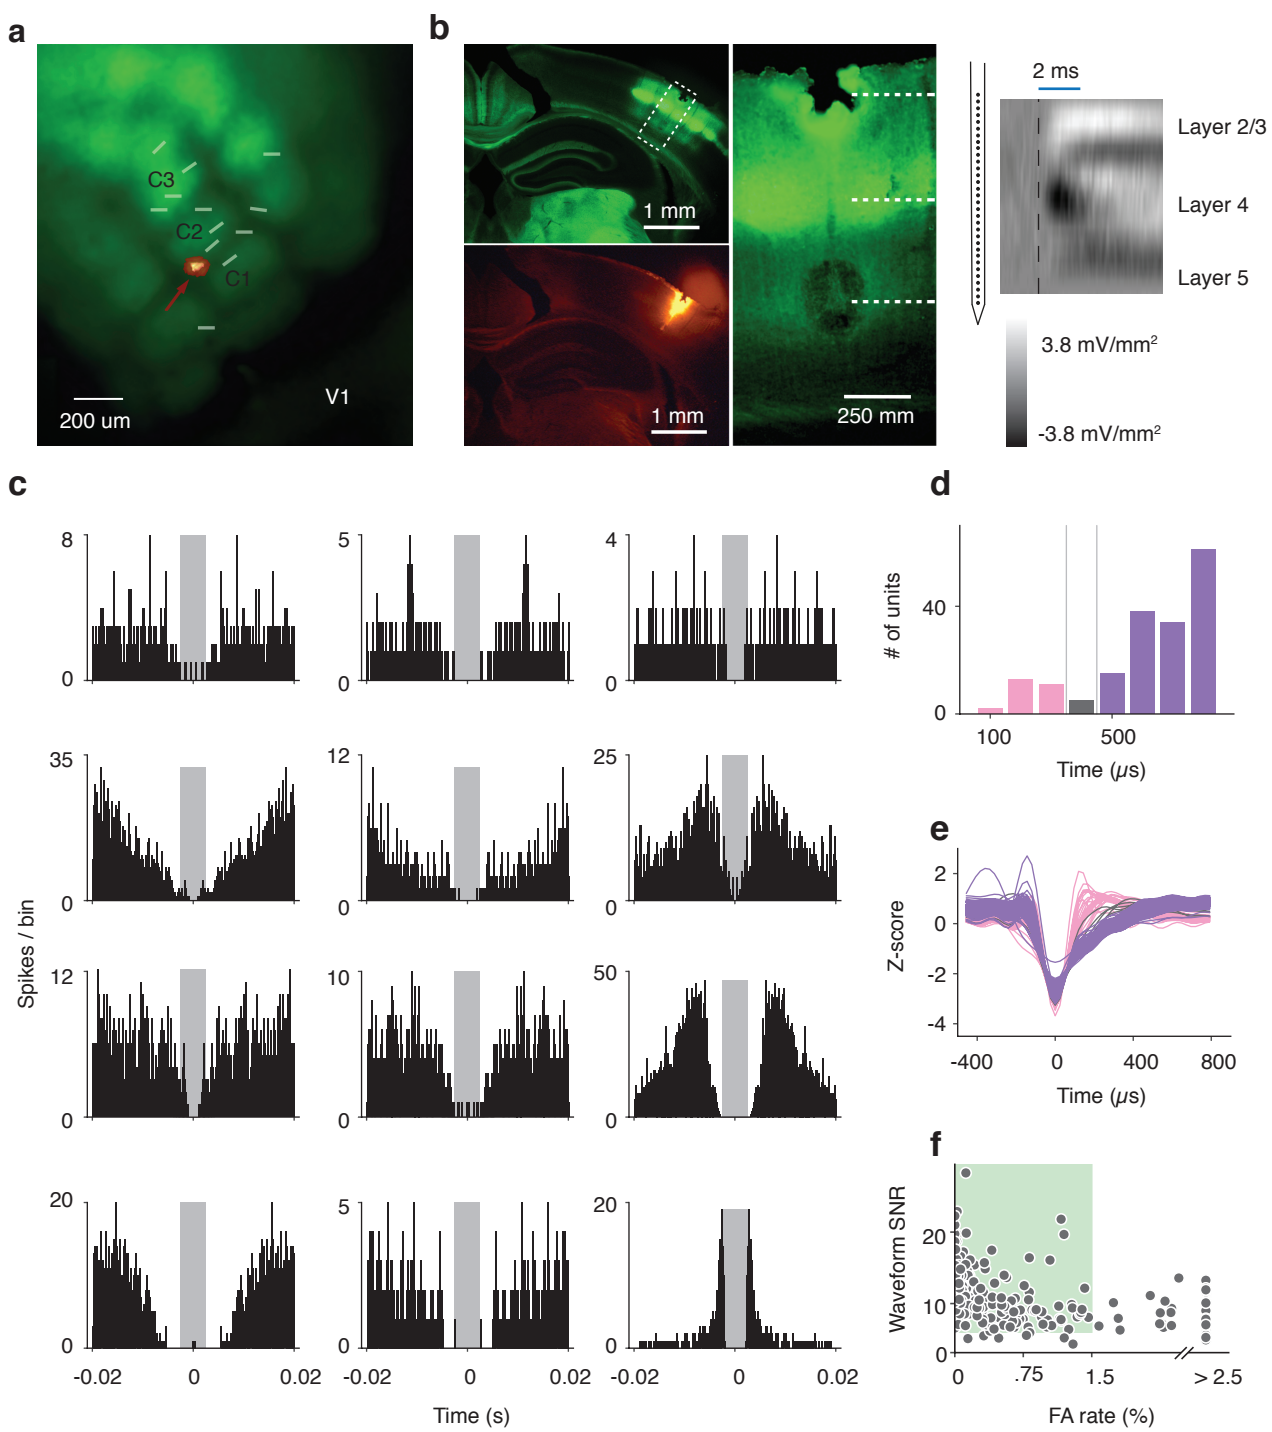

Supplement: supp [file elife_poa_e12559_Figure_4_figure_supplement_1.pdf › elife_poa_e12559_Figure_4_figure_supplement_1.pdf]

**a**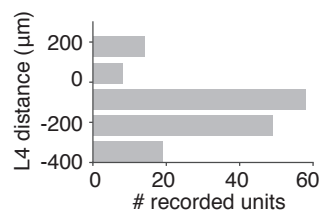**b**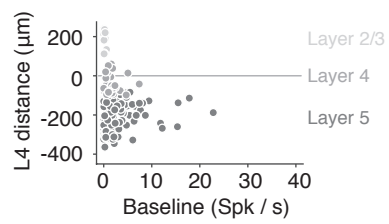**c**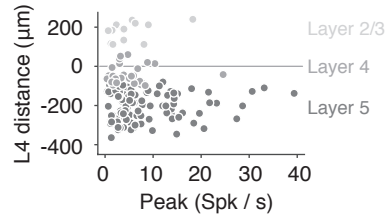

Supplement: supp [file elife_poa_e12559_Figure_4_figure_supplement_2.pdf › elife_poa_e12559_Figure_4_figure_supplement_2.pdf]

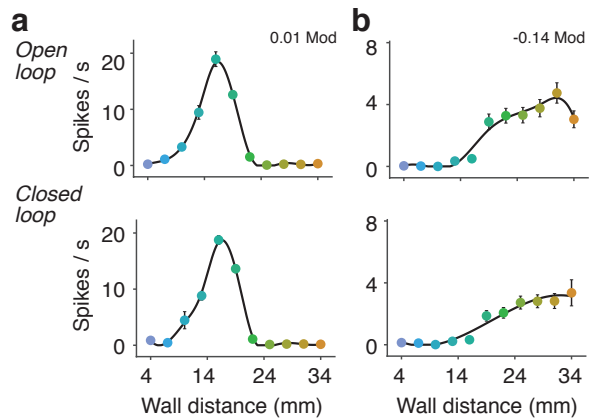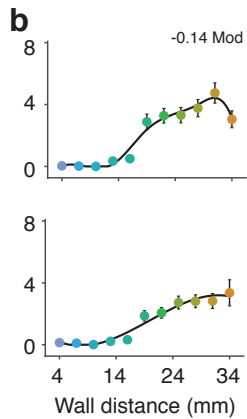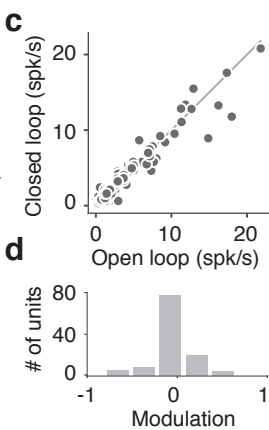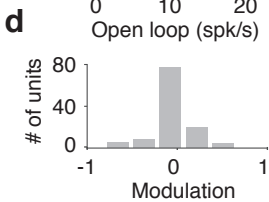

Supplement: supp [file elife_poa_e12559_Figure_4_figure_supplement_3.pdf › elife_poa_e12559_Figure_4_figure_supplement_3.pdf]

**a**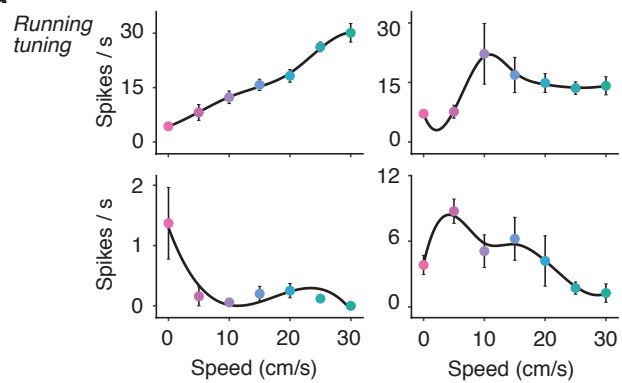**b**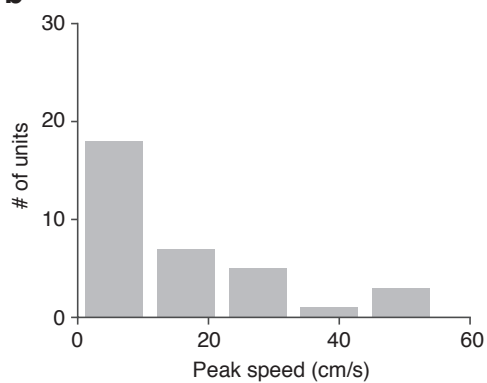**c**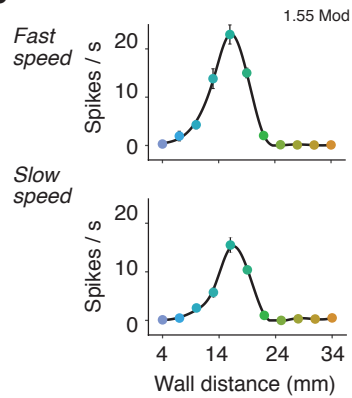**d**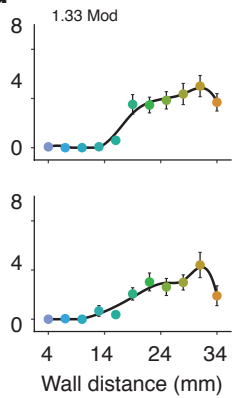**e**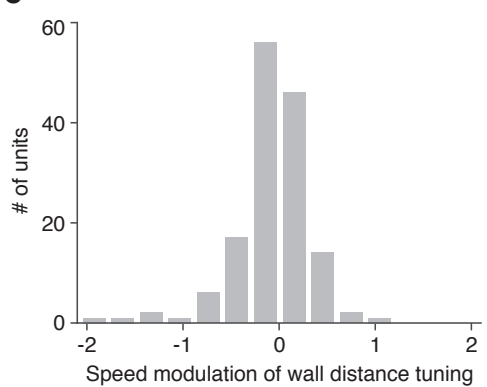

Supplement: supp [file elife_poa_e12559_Figure_4_figure_supplement_4.pdf › elife_poa_e12559_Figure_4_figure_supplement_4.pdf]

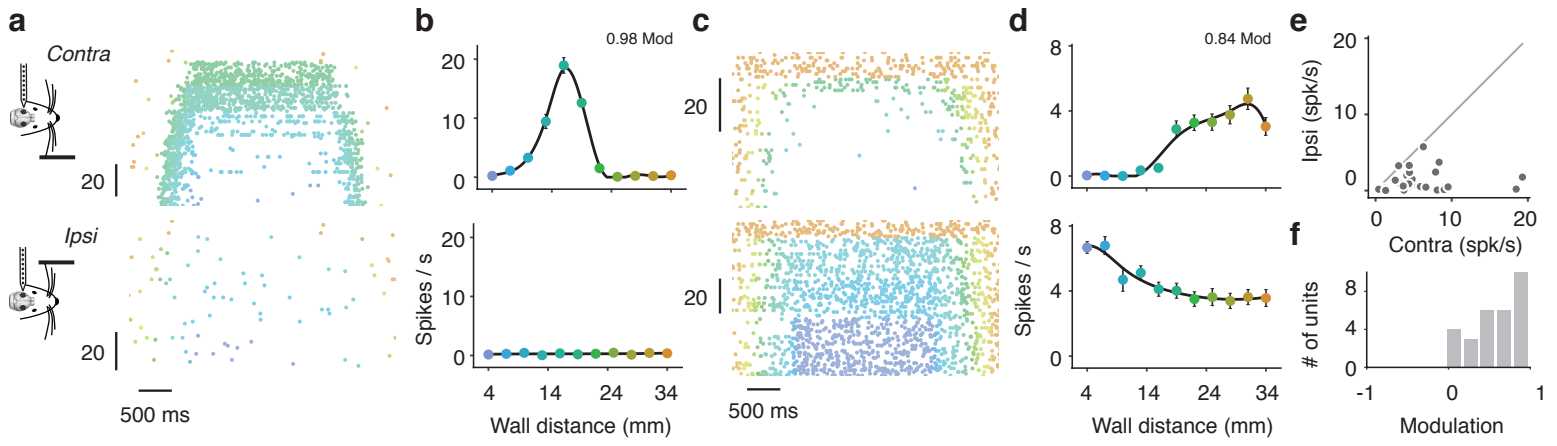

Supplement: supp [file elife_poa_e12559_Figure_4_figure_supplement_5.pdf › elife_poa_e12559_Figure_4_figure_supplement_5.pdf]
